# Supplementary material for: Investigating ellagitannins from strawberry (Fragaria × ananassa Duch.) as a new strategy to counteract H. pylori infection and inflammation
Source: Royal Society of Chemistry journal article supplement (doi:10.1039/d5fo01022e), 2025-01-01
Supplement: d5fo01022e4.pdf [file d5fo01022e4.pdf]

## Investigating ellagitannins from strawberry (*Fragaria × ananassa* Duch.) as a new strategy to counteract *H. pylori* infection and inflammation

Giulia Martinelli<sup>1</sup>, Stefano Piazza<sup>1</sup>, Marco Fumagalli<sup>1</sup>, Nicole Maranta<sup>1</sup>, Carola Pozzoli<sup>1</sup>, Elisa Sonzogno<sup>1</sup>, Safwa Moheb El Haddad<sup>1</sup>, Urska Vrhovsek<sup>2</sup>, Fulvio Mattivi<sup>2</sup>, Enrico Sangiovanni<sup>1\*</sup>, Emma De Fabiani<sup>1</sup>, Mario Dell'Agli<sup>1</sup>

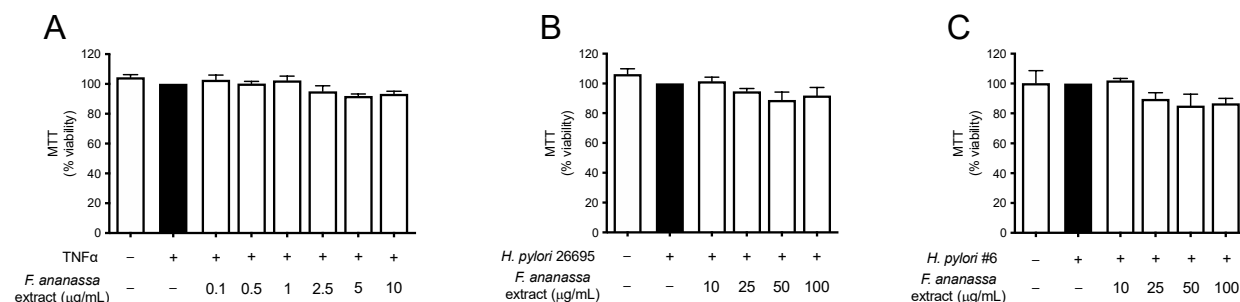

**Figure S1.** The cytotoxicity of *Fragaria × ananassa* extract on GES-1 cells.

GES-1 cells were treated with extract at different concentrations (ranging from 0.1 - 100 μg/mL) and TNFα (A), or *H. pylori* 26695 (B), or *H. pylori* #6 (C), for 6 hours. The viability of cells was measured by MTT assay. The results are presented as the mean ± SEM of three experiments (n=3) and expressed as the relative percentage compared to stimulus (black bar), which was arbitrarily assigned the value of 100%.

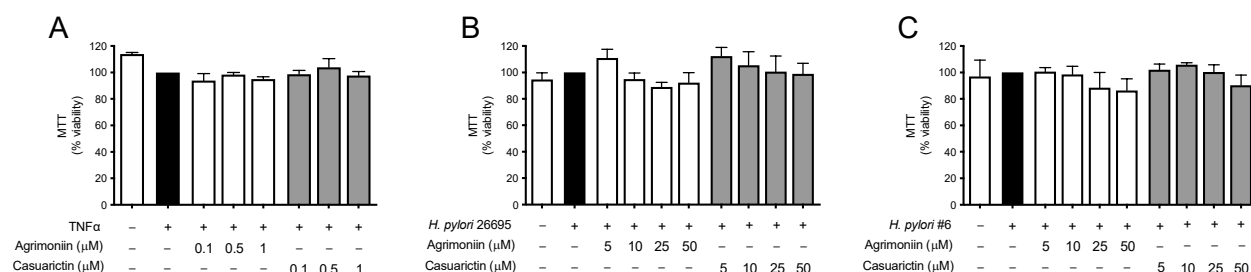

**Figure S2.** The cytotoxicity of ellagitannins from *Fragaria × ananassa* extract, agrimoniin and casuarictin, on GES-1 cells.

GES-1 cells were treated with agrimoniin (white bars) or casuarictin (grey bars) at different concentrations (ranging from 0.1 - 50 μM) and TNFα (A), or *H. pylori* 26695 (B), or *H. pylori* #6 (C), for 6 hours. The viability of cells was measured by MTT assay. The results are presented as the mean ± SEM of three experiments (n=3) and expressed as the relative percentage compared to stimulus (black bar), which was arbitrarily assigned the value of 100%.
